# Supplementary material
Source: MDPI journal article supplement (https://www.mdpi.com/2071-1050/12/4/1374)
Supplement: s1 [file s1]

## Supplementary Materials:

Table S1: The fields and selected outcomes of the studies in this analysis.

| Fields                  | Studies reviewed                                                                                                                                                                                                                                                                       | Selected outcomes                                                                                                                                 |
|-------------------------|----------------------------------------------------------------------------------------------------------------------------------------------------------------------------------------------------------------------------------------------------------------------------------------|---------------------------------------------------------------------------------------------------------------------------------------------------|
| Environmental education | Birdsall, S. (2010). Empowering students to act: Learning about, through and from the nature of action. <i>Australian Journal of Environmental Education</i> , 26, 65-84. doi:10.1017/s0814062600000835                                                                                | Students developed different types of knowledge and took informed action toward sustainability categorized as action competence.                  |
|                         | Bohnet, I. C., Gooch, M., & Hickey, R. (2010). Young people envision the future of their local area: An explorative study from the wet tropics, Australia. <i>Applied Environmental Education &amp; Communication</i> , 9(3), 185-197. doi:10.1080/1533015x.2010.510027                | Participants visioned the future of their community and understanding their citizenship by realizing the problem of their community.              |
|                         | Cincera, J., & Krajhanzl, J. (2013). Eco-Schools: What factors influence pupils' action competence for pro-environmental behaviour? <i>Journal of Cleaner Production</i> , 61, 117-121. doi:10.1016/j.jclepro.2013.06.030                                                              | The program cultivated pupils' action competence and perceived participation in decision-making in energy and water consumption in the household. |
|                         | Cincera, J., Kroufek, R., Simonova, P., Broukalova, L., Broukal, V., & Skalík, J. (2017). Eco-School in kindergartens: the effects, interpretation, and implementation of a pilot program. <i>Environmental Education Research</i> , 23(7), 919-936. doi:10.1080/13504622.2015.1076768 | The project raised the pro-environmental attitude of the kindergarten students, especially by the emancipatory strategy.                          |
|                         | de Vreede, C., Warner, A., & Pitter, R. (2013). Facilitating youth to take sustainability actions: The potential of peer education. <i>The Journal of Environmental Education</i> , 45(1), 37-56. doi:10.1080/00958964.2013.805710                                                     | Peer education approach facilitated high school students to take sustainability action.                                                           |
|                         | Eames, C., & Barker, M. (2012). Understanding student learning in environmental education in Aotearoa New Zealand. <i>Australian Journal of Environmental Education</i> , 27(01), 186-191. doi:10.1017/s0814062600000173                                                               | Two framework contributed to guide school to develop action competence of primary and secondary school students.                                  |
|                         | Ernst, J., Blood, N., & Beery, T. (2017).                                                                                                                                                                                                                                              |                                                                                                                                                   |

---

|                                                                                                                                                                                                                                                                                                                                      |                                                                                                                                                                                                |
|--------------------------------------------------------------------------------------------------------------------------------------------------------------------------------------------------------------------------------------------------------------------------------------------------------------------------------------|------------------------------------------------------------------------------------------------------------------------------------------------------------------------------------------------|
| Environmental action and student environmental leaders: exploring the influence of environmental attitudes, locus of control, and sense of personal responsibility. <i>Environmental Education Research</i> , 23(2), 149-175.<br>doi:10.1080/13504622.2015.1068278                                                                   | The environmental attitudes, locus of control, sense personal responsibility were increase. The environmental attitude could predict environmental action developed by the educational effort. |
| Gooch, M., Rigano, D., Hickey, R., & Fien, J. (2008). How do primary pre-service teachers in a regional Australian university plan for teaching, learning and acting in environmentally responsible ways? <i>Environmental Education Research</i> , 14(2), 175-186. doi:10.1080/13504620801951715                                    | The instructional plans enacted by pre-service teachers were not consistent in their beliefs, outcomes, learning experiences, assessment with the lack of the beliefs.                         |
| Gottlieb, D., Vigoda-Gadot, E., & Haim, A. (2013). Encouraging ecological behaviors among students by using the ecological footprint as an educational tool: A quasi-experimental design in a public high school in the city of Haifa. <i>Environmental Education Research</i> , 19(6), 844-863.<br>doi:10.1080/13504622.2013.768602 | Using the ecological footprint as a tool to significantly promote personal norms, behavioral intentions, and perceived behavioral control of high school students.                             |
| Katsenou, C., Flogaitis, E., & Liarakou, G. (2015). Action research to encourage pupils' active participation in the sustainable school. <i>Applied Environmental Education &amp; Communication</i> , 14(1), 14-22.<br>doi:10.1080/1533015x.2014.994820                                                                              | Adopting the framework of sustainability helped pupils identify the difficulties and improve their participation in classroom, school, and community.                                          |
| Krasny, M. E., Kalbacker, L., Stedman, R. C., & Russ, A. (2015). Measuring social capital among youth: Applications in environmental education. <i>Environmental Education Research</i> , 21(1), 1-23.<br>doi:10.1080/13504622.2013.843647                                                                                           | The EE programs had positive outcomes on informal socializing and diversity of friendship in youth social capital compared to non-intervention group.                                          |
| Krasny, M. E., & Roth, W. M. (2010). Environmental education for social-ecological system resilience: A perspective from activity theory. <i>Environmental Education Research</i> , 16(5-6), 545-558.<br>doi:10.1080/13504622.2010.505431                                                                                            | The project provided middle school students with opportunities to engage in multiple activity systems to make informed decisions through action competence.                                    |
| Kumler, L. M. (2010). Students of action? A comparative investigation of secondary science and social studies students' action                                                                                                                                                                                                       |                                                                                                                                                                                                |

---

|                  |                                                                                                                                                                                                                                                                                                                                                                                                                                                                                                                                                                                                                                                                                                                                                                                                                                                                                                                                                                                                                                                                                                                                                                                                                                                                                                                                                                                                                                                                 |                                                                                                                                                                                                                                                                                                                                                                                                                                                                                                                                                                                                                                                                                                                                                                                                                                                                                                                                                                                           |
|------------------|-----------------------------------------------------------------------------------------------------------------------------------------------------------------------------------------------------------------------------------------------------------------------------------------------------------------------------------------------------------------------------------------------------------------------------------------------------------------------------------------------------------------------------------------------------------------------------------------------------------------------------------------------------------------------------------------------------------------------------------------------------------------------------------------------------------------------------------------------------------------------------------------------------------------------------------------------------------------------------------------------------------------------------------------------------------------------------------------------------------------------------------------------------------------------------------------------------------------------------------------------------------------------------------------------------------------------------------------------------------------------------------------------------------------------------------------------------------------|-------------------------------------------------------------------------------------------------------------------------------------------------------------------------------------------------------------------------------------------------------------------------------------------------------------------------------------------------------------------------------------------------------------------------------------------------------------------------------------------------------------------------------------------------------------------------------------------------------------------------------------------------------------------------------------------------------------------------------------------------------------------------------------------------------------------------------------------------------------------------------------------------------------------------------------------------------------------------------------------|
|                  | <p>repertoires in a land use context. <i>The Journal of Environmental Education</i>, 42(1), 14-29.<br/>doi:10.1080/00958960903479829</p> <p>Liarakou, G., Kostelou, E., &amp; Gavrilakis, C. (2011). Environmental volunteers: Factors influencing their involvement in environmental action. <i>Environmental Education Research</i>, 17(5), 651-673.<br/>doi:10.1080/13504622.2011.572159</p> <p>Lynch, J., Eilam, E., Fluker, M., &amp; Augar, N. (2017). Community-based environmental monitoring goes to school: Translations, detours and escapes. <i>Environmental Education Research</i>, 23(5), 708-721.<br/>doi:10.1080/13504622.2016.1182626</p> <p>Monroe, M. C., Ballard, H. L., Oxarart, A., Sturtevant, V. E., Jakes, P. J., &amp; Evans, E. R. (2015). Agencies, educators, communities and wildfire: Partnerships to enhance environmental education for youth. <i>Environmental Education Research</i>, 22(8), 1098-1114.<br/>doi:10.1080/13504622.2015.1057555</p> <p>Schindel Dimick, A. (2015). Supporting youth to develop environmental citizenship within/against a neoliberal context. <i>Environmental Education Research</i>, 21(3), 390-402.<br/>doi:10.1080/13504622.2014.994164</p> <p>Wake, S. J., &amp; Eames, C. (2013). Developing an “ecology of learning” within a school sustainability co-design project with children in New Zealand. <i>Local Environment</i>, 18(3), 305-322.<br/>doi:10.1080/13549839.2012.748723</p> | <p>The curriculum improved students’ abilities to take nonemanagement actions and to make decisions in support of sustainable land use.</p> <p>Learning with nature was the important factor in volunteer motivation. Some volunteers who had previously participated in the EE program had more voluntary action.</p> <p>Action competence was developed through the project of monitoring local coast environment with the involvement of the community stakeholders.</p> <p>The youth learned and took action in educator–agency–community partnerships. Youth gained action competence, including community skills and efficacy, to promote agency partners to attain their goals.</p> <p>Educators could support youth to develop different forms of the environmental citizenship for disrupting the privatization of responsibility.</p> <p>The student-led, adult-facilitated, action-taking project provided authentic and sustainability learning experiences for students.</p> |
| Health education | <p>Carlsson, M., &amp; Simovska, V. (2012). Exploring learning outcomes of school-based health promotion--a multiple case study. <i>Health Education Research</i>, 27(3), 437-447.</p>                                                                                                                                                                                                                                                                                                                                                                                                                                                                                                                                                                                                                                                                                                                                                                                                                                                                                                                                                                                                                                                                                                                                                                                                                                                                          | <p>Knowledge, commitment, visions, and action experiences were improved when students made change in their communities.</p>                                                                                                                                                                                                                                                                                                                                                                                                                                                                                                                                                                                                                                                                                                                                                                                                                                                               |

|                      |                                                                                                                                                                                                                                                                                                                                                                                                         |                                                                                                                                                                                                                                                   |
|----------------------|---------------------------------------------------------------------------------------------------------------------------------------------------------------------------------------------------------------------------------------------------------------------------------------------------------------------------------------------------------------------------------------------------------|---------------------------------------------------------------------------------------------------------------------------------------------------------------------------------------------------------------------------------------------------|
|                      | doi:10.1093/her/cys011                                                                                                                                                                                                                                                                                                                                                                                  |                                                                                                                                                                                                                                                   |
|                      | Riemer, M., Voorhees, C., Dittmer, L., Alisat, S.,<br>Alam, N., Sayal, R., Bidisha, S. H., De<br>Souza, A., Lynes, J., Metternich, A.,<br>Mugagga, F., Schweizer-Ries, P. (2016).<br>The youth leading environmental change<br>project: A mixed-method longitudinal<br>study across six countries. <i>Ecopsychology</i> ,<br>8(3), 174-187. doi:10.1089/eco.2016.0025                                   | The transformative learning experience<br>facilitated the self-efficacy,<br>engagement, and action of the<br>participants through relating them to the<br>environmental issues and regarding<br>themselves as the change agents.                  |
|                      | Sayal, R., Bidisha, S. H., Lynes, J., Riemer, M.,<br>Jasani, J., Monteiro, E., Hey, B., De Souza,<br>A., Wicks, S., Eady, A. (2016). Fostering<br>systems thinking for youth leading<br>environmental change: A multinational<br>exploration. <i>Ecopsychology</i> , 8(3), 188-201.<br>doi:10.1089/eco.2016.0023                                                                                        | The program engaged urban youth from<br>three countries to have moderate-to high<br>interest in the environment through<br>fostering systems thinking by<br>international exchange and a local<br>speaker focusing on environmental<br>injustice. |
|                      | Simovska, V. (2007). The changing meanings of<br>participation in school-based health<br>education and health promotion: the<br>participants' voices. <i>Health Education<br/>Research</i> , 22(6), 864-878.<br>doi:10.1093/her/cym023                                                                                                                                                                  | Exploring, envisaging solutions of the<br>problems, and acting to bring about<br>positive changes led to the intent and<br>development of new strategies for<br>collaboration.                                                                    |
| Science<br>education | Barrett, M. J., & Sutter, G. C. (2006). A youth forum<br>on sustainability meets the human factor:<br>Challenging cultural narratives in schools<br>and museums. <i>Canadian Journal of<br/>Science, Mathematics and Technology<br/>Education</i> , 6(1), 9-23.<br>doi:10.1080/14926150609556685                                                                                                        | The museum attempted to engage high<br>school students in sustainability issues,<br>and made some suggestions for<br>improving future program.                                                                                                    |
|                      | Hadjichambis, A. C., Paraskeva-Hadjichambi, D.,<br>Ioannou, H., Georgiou, Y., & Manoli, C. C.<br>(2015). Integrating sustainable<br>consumption into environmental education:<br>A case study on environmental<br>representations, decision making and<br>Intention to act. <i>International Journal of<br/>Environmental and Science<br/>Education</i> , 10(1), 67-86.<br>doi:10.12973/ijese.2015.231a | A more comprehensive representation<br>concerning sustainability and<br>environmental criteria for acting as<br>sustainable consumers were increased<br>after the learning intervention.                                                          |
|                      | Taber, F., & Taylor, N. (2009). Climate of concern -<br>A search for effective strategies for                                                                                                                                                                                                                                                                                                           | The intervention allowed students to have<br>a better understanding on climate change<br>with raising concerns in the cases by                                                                                                                    |

|                        |                                                                                                                                                                                                                           |                                                                                                                                                                      |
|------------------------|---------------------------------------------------------------------------------------------------------------------------------------------------------------------------------------------------------------------------|----------------------------------------------------------------------------------------------------------------------------------------------------------------------|
|                        | teaching children about global warming. <i>International Journal of Environmental and Science Education</i> , 4(2), 97-116.                                                                                               | hands-on and visual instruction.                                                                                                                                     |
|                        | Tal, T., & Abramovitch, A. (2012). Activity and action: Bridging environmental sciences and environmental education. <i>Research in Science Education</i> , 43(4), 1665-1687. doi:10.1007/s11165-012-9327-9               | Teachers deliberated on the teaching topics and had more instructional methods. The student assessment also improved by the workshop.                                |
| Curriculum studies     | Elmose, S., & Roth, W. M. (2007). Allgemeinbildung: Readiness for living in risk society. <i>Journal of Curriculum Studies</i> , 37(1), 11-34. doi:10.1080/0022027041000229413                                            | The project supported students to participate in the unit and take responsibility in local school community by visioning and investigating the problem.              |
|                        | Jensen, B. B. (2004). Environmental and health education viewed from an action-oriented perspective: A case from Denmark. <i>Journal of Curriculum Studies</i> , 36(4), 405-425. doi:10.1080/0022027032000167235          | Students demonstrated a commitment to future actions in influencing the community through the empowerment and action competence presented by students.               |
|                        | Simovska, V., & Jensen, B. B. (2008). On-line learning environments and participatory health education: Teachers' reflections. <i>Journal of Curriculum Studies</i> , 40(5), 651-669. doi:10.1080/00220270701648092       | Integrating participatory and action-oriented approaches with technology use and cross-country collaboration provided genuine student participation in authenticity. |
| Education              | Aguayo, C., & Eames, C. (2017). Promoting community socio-ecological sustainability through technology: A case study from Chile. <i>International Review of Education</i> , 63(6), 871-895. doi:10.1007/s11159-017-9685-7 | Most participants demonstrated positive learning outcomes in ecological literacy and carried out actions toward the community issue.                                 |
|                        | Norðdahl, K., & Jóhannesson, I. Á. (2014). 'Let's go outside': Icelandic teachers' views of using the outdoors. <i>Education 3-13</i> , 44(4), 391-406. doi:10.1080/03004279.2014.961946                                  | The outdoors enhanced play and learning, promoted health and courage, as well as affecting perspectives and actions of the children.                                 |
| Art education          | Jónsdóttir, Á. (2015). Teaching and learning for sustainability: An Icelandic practice-based research. <i>International Journal of Education Through Art</i> , 11(3), 391-406. doi:10.1386/eta.11.3.391_1                 | Using the artistic approach enabled the participants to express their personal and community concerns by working on sustainability .                                 |
| Geographical education | McMillan, S. G., & Binns, T. (2011). Environmental education and learning communities: The case of Kaikorai Stream, Dunedin, New                                                                                          | The programe allowed students to participate in investigating the problem of the stream with the improvement on the                                                  |

|        |                                                                                                                                                                                                                                                                                                          |                                                                                                                                           |
|--------|----------------------------------------------------------------------------------------------------------------------------------------------------------------------------------------------------------------------------------------------------------------------------------------------------------|-------------------------------------------------------------------------------------------------------------------------------------------|
|        | Zealand. <i>New Zealand Geographer</i> , 67(3), 199-212. doi:10.1111/j.1745-7939.2011.01212.x                                                                                                                                                                                                            | knowledge and attitude toward sustainability.                                                                                             |
| Others | Gauthier, B., Guilbert, L., & Pelletier, M. L. (2000). Développement de compétences en résolution de problèmes environnementaux dans un contexte africain. <i>Canadian Journal of Development Studies/Revue canadienne d'études du développement</i> , 21(3), 775-796. doi:10.1080/02255189.2000.9669912 | The model presented an impact on the competences of the participants to resolve complex problems from the interaction of the environment. |
